# Supplementary material
Source: publisher site journal article supplement (https://www.dovepress.com/article/245955)
Supplement: Supplementary file 1 [file get_supplementary_file.php]

**Table S1.** List of approving ethics committees

| **Name of ethics committee** | **Address** |
| --- | --- |
| Azienda Ospedaliero Universitaria di Cagliari Comitato Etica | Via Ospedale 54 Cagliari |
| Azienda Ospedaliero Universitaria Policlinico Vittori Emanuele Catania Comitato Etica | Via Santa Sofia 78 Catania |
| Aziende Ospedaliere di Rilievo Nazionale e di Alta Specializzazione " A. Cardarelli/Santobono-Pausilipon Comitato Etico | Santobono-Pausilipon |
| Comitato Etico delle prvince di Chieti e Pescara | N/A |
| Azienda Sanitaria Locale/ Regione Abruzzo Comitato Etico | Via Saragat L´Aquila |
| Comitato Etico Indipendente Azienda Ospedaliero-Universitaria | Pissa Giulo Cessare 11; Bari |
| Comitato Etico della provincia di Bergamo | Piazza OMS, 1 Bergamo |
| Azienda Ospedaliera Universitaria Polclinico Paolo Giaccone Comitato Etico Palermo 1 | Palermo |
| Azienda Ospedaliera di Rilievo Nazionale e di Alta Specializzazione"Garibaldi" | Piazza S. Maria di Gesu 5, Catania |
| Azienda Ospedaliero Universitaria San Luigi Gonzaga | Regione Gonzole10, Orbassano |
| Azienda Ospedaliero Universitaria Pisana | Via Roma 67, Pisa |
| Fondazione don Carlo Gnocchi Onlus | Regione Lombardia |
| Azienda Ospedaliera Ospedali Riuniti Villa Sofia Cervello Palermo 2 | Viale Strasburgo 133, Palermo |
| Ospedale Niguarda CAGranda Comitat Etico Mialano Area C | Vilae Certosa 210 Milano |
| ASLSARRASI Comitato di Bioetica | Sassari |
| Ethikkomission für das Bundesland Salzburg | 5010 Salzburg |
| Ethikkomission Medizinische Universität Wien | 1090 Wien |
| Université Catholique de Louvain; Faculté de Médecine Comité d´Ethique Hospitalo Facultaire | 1200 Bruxelles |
| Bosna I Hercegovina; Agencija Za Lijekove I Medicinska Sredstva | 78000 Banja Luka |
| Agency for Medicinal Products and medical devices | 10000 Zagreb Croatia |
| Etického Kodexu | Praha |
| Comité Consultatif sur le traitement de l´information en matiere de recherche dans le domaine de la santé | 1, rue Descartes, 75231 Paris |
| Commissions Nationale de l´informatique et des Libertes | 8 rue Vivienne, 75083 Paris |
| Ordre National des Médecins/Conseil National de l´Ordre | 75389 Paris |
| Medisch Ethische Toetsingscommissie; METC -Atrium-Orbis Zuyd | 6401 CX Heerlen |
| Academisch Medisch Centrum Universiteit van Amsterdand | 1100 DD Amsterdam |
| CEIC Hospiatl Clinico San Carlos | 28040 Madrid Spain |

N/A, not available.
